# Supplementary material for: Immune Characteristics of Chinese Diffuse Large B-Cell Lymphoma Patients: Implications for Cancer Immunotherapies
Source: PubMed Central journal article supplement — eBioMedicine. 2018 Jun 20;33:94–104. doi: 10.1016/j.ebiom.2018.06.010 (PMC6085499; doi:10.1016/j.ebiom.2018.06.010), 2018-06-20
Supplement: mmc3.pdf [file mmc3.pdf]

(a)

| Medium (SD)     | T effector  | IFNG        | APC         | TCR signaling | Th2          | Myeloid      | T regulatory |
|-----------------|-------------|-------------|-------------|---------------|--------------|--------------|--------------|
| GCB (n=82)      | 0.32 (0.87) | 1.37 (1.14) | 0.38 (0.78) | 2.26 (0.61)   | -2.85 (0.87) | -1.61 (0.72) | -2.04 (1.19) |
| ABC (n=77)      | 0.87 (0.95) | 1.78 (1.17) | 0.70 (0.81) | 2.13 (0.57)   | -2.27 (0.81) | -1.98 (0.76) | -2.46 (1.24) |
| UNC (n=37)      | 0.51 (1.01) | 1.19 (1.17) | 0.59 (0.72) | 1.97 (0.68)   | -2.69 (0.84) | -2.05 (0.90) | -2.20 (0.97) |
| <i>p</i> -value | 0.0008      | 0.0316      | 0.0198      | 0.2937        | 0.0004       | 0.0220       | 0.0357       |

(b)

| Medium (SD)     | T effector  | IFNG        | APC         | TCR signaling | Th2          | Myeloid      | T regulatory |
|-----------------|-------------|-------------|-------------|---------------|--------------|--------------|--------------|
| MYC-High (n=70) | 0.63 (0.97) | 1.46 (1.07) | 0.57 (0.82) | 1.92 (0.52)   | -2.57 (0.89) | -2.01 (0.77) | -2.56 (1.05) |
| MYC-Low (n=74)  | 0.67 (1.04) | 1.68 (1.29) | 0.54 (0.74) | 2.25 (0.64)   | -2.54 (0.89) | -1.75 (0.79) | -2.21 (1.27) |
| <i>p</i> -value | 0.7114      | 0.4965      | 0.7039      | 0.0067        | 0.7642       | 0.0784       | 0.0455       |

(c)

| Medium (SD)       | T effector  | IFNG        | APC         | TCR signaling | Th2          | Myeloid      | T regulatory |
|-------------------|-------------|-------------|-------------|---------------|--------------|--------------|--------------|
| PD-L1 High (n=98) | 0.95 (0.87) | 2.23 (1.17) | 0.57 (0.76) | 2.19 (0.54)   | -2.61 (0.83) | -1.81 (0.79) | -2.22 (1.21) |
| PD-L1 Low (n=98)  | 0.12 (0.82) | 1.06 (0.93) | 0.49 (0.80) | 2.15 (0.67)   | -2.53 (0.90) | -1.98 (0.76) | -2.36 (1.16) |
| <i>p</i> -value   | <0.0001     | <0.0001     | 0.2460      | 0.4777        | 0.8729       | 0.0672       | 0.6672       |

(d)

| Medium (SD)      | T effector  | IFNG        | APC         | TCR signaling | Th2          | Myeloid      | T regulatory |
|------------------|-------------|-------------|-------------|---------------|--------------|--------------|--------------|
| IDO1 High (n=98) | 1.13 (0.80) | 2.35 (0.84) | 0.34 (0.73) | 2.30 (0.55)   | -2.75 (0.86) | -1.58 (0.73) | -2.17 (1.30) |
| IDO1 Low (n=98)  | 0.03 (0.78) | 0.76 (0.78) | 0.72 (0.79) | 1.94 (0.63)   | -2.46 (0.86) | -2.26 (0.74) | -2.40 (1.07) |
| <i>p</i> -value  | <0.0001     | <0.0001     | 0.0010      | 0.0006        | 0.0588       | <0.0001      | 0.6384       |
