# Supplementary figures and images for: Immune Characteristics of Chinese Diffuse Large B-Cell Lymphoma Patients: Implications for Cancer Immunotherapies
Source: PubMed Central journal article supplement — eBioMedicine. 2018 Jun 20;33:94–104. doi: 10.1016/j.ebiom.2018.06.010 (PMC6085499; doi:10.1016/j.ebiom.2018.06.010), 2018-06-20

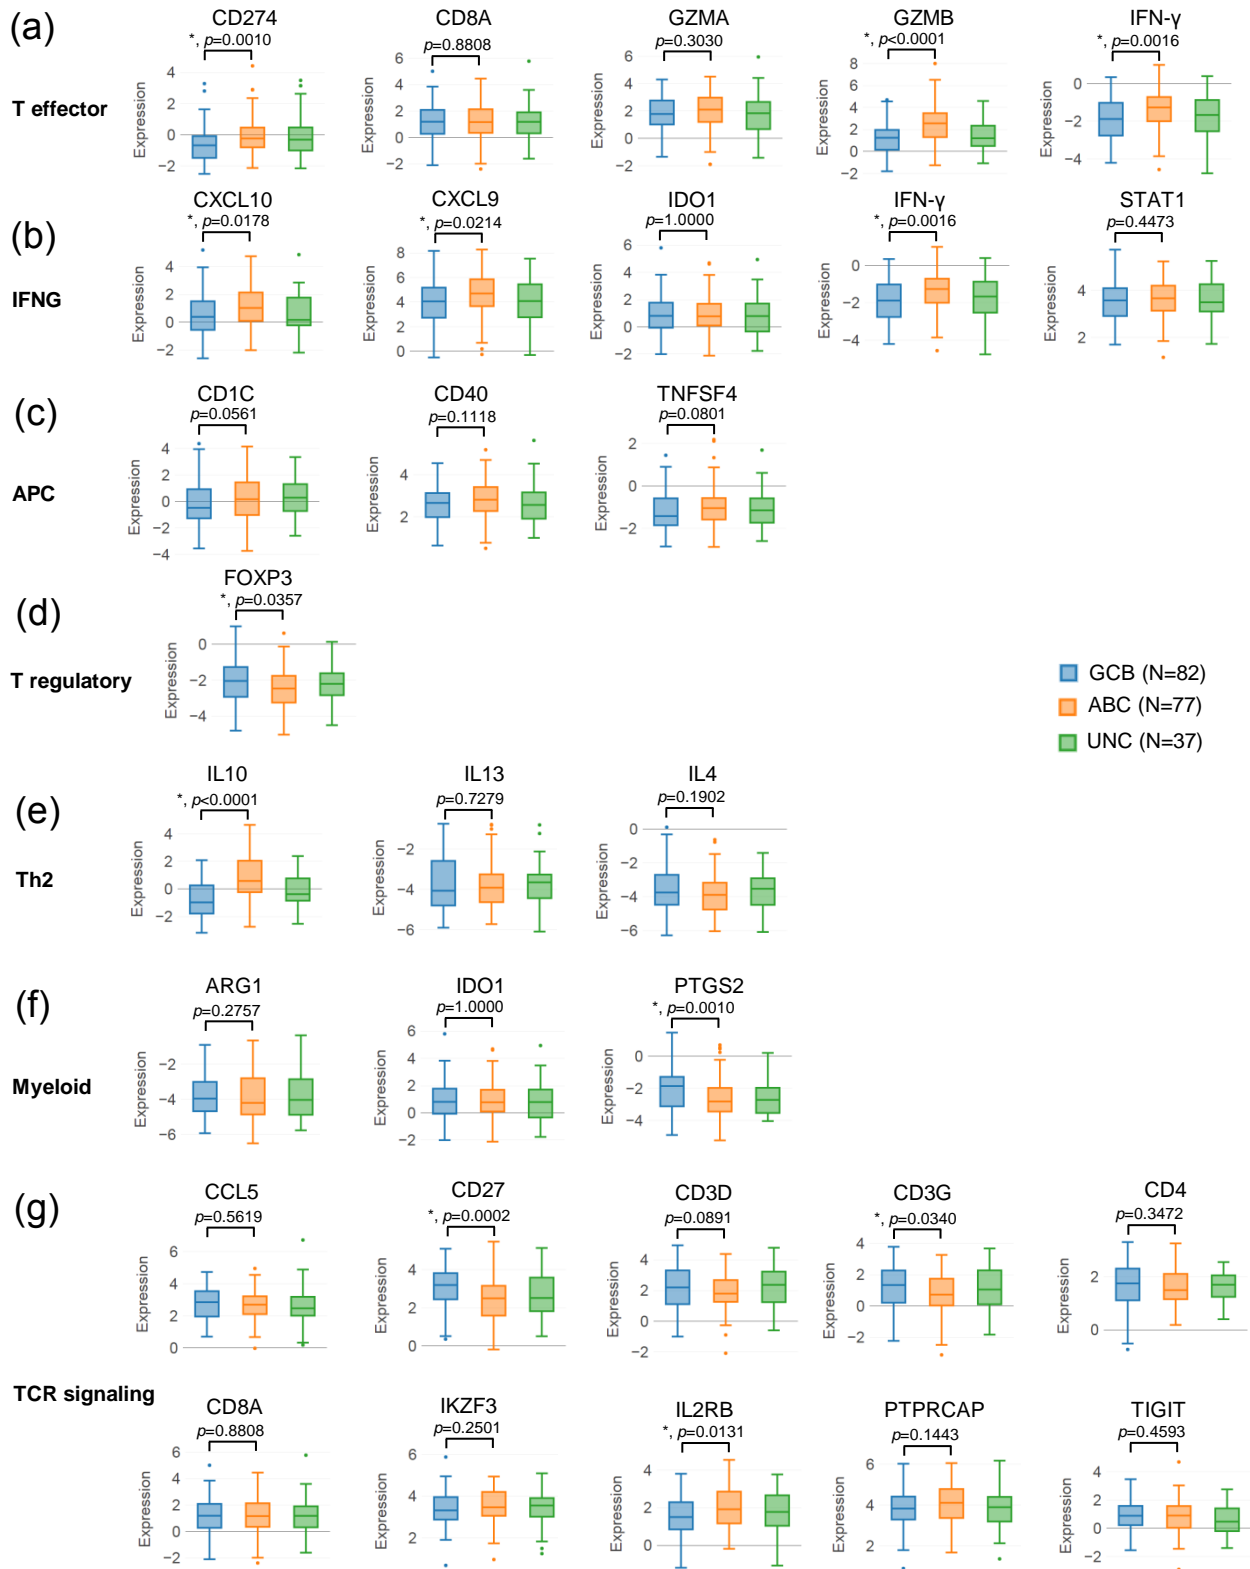

Supplement: mmc1.pdf [file mmc1.pdf]

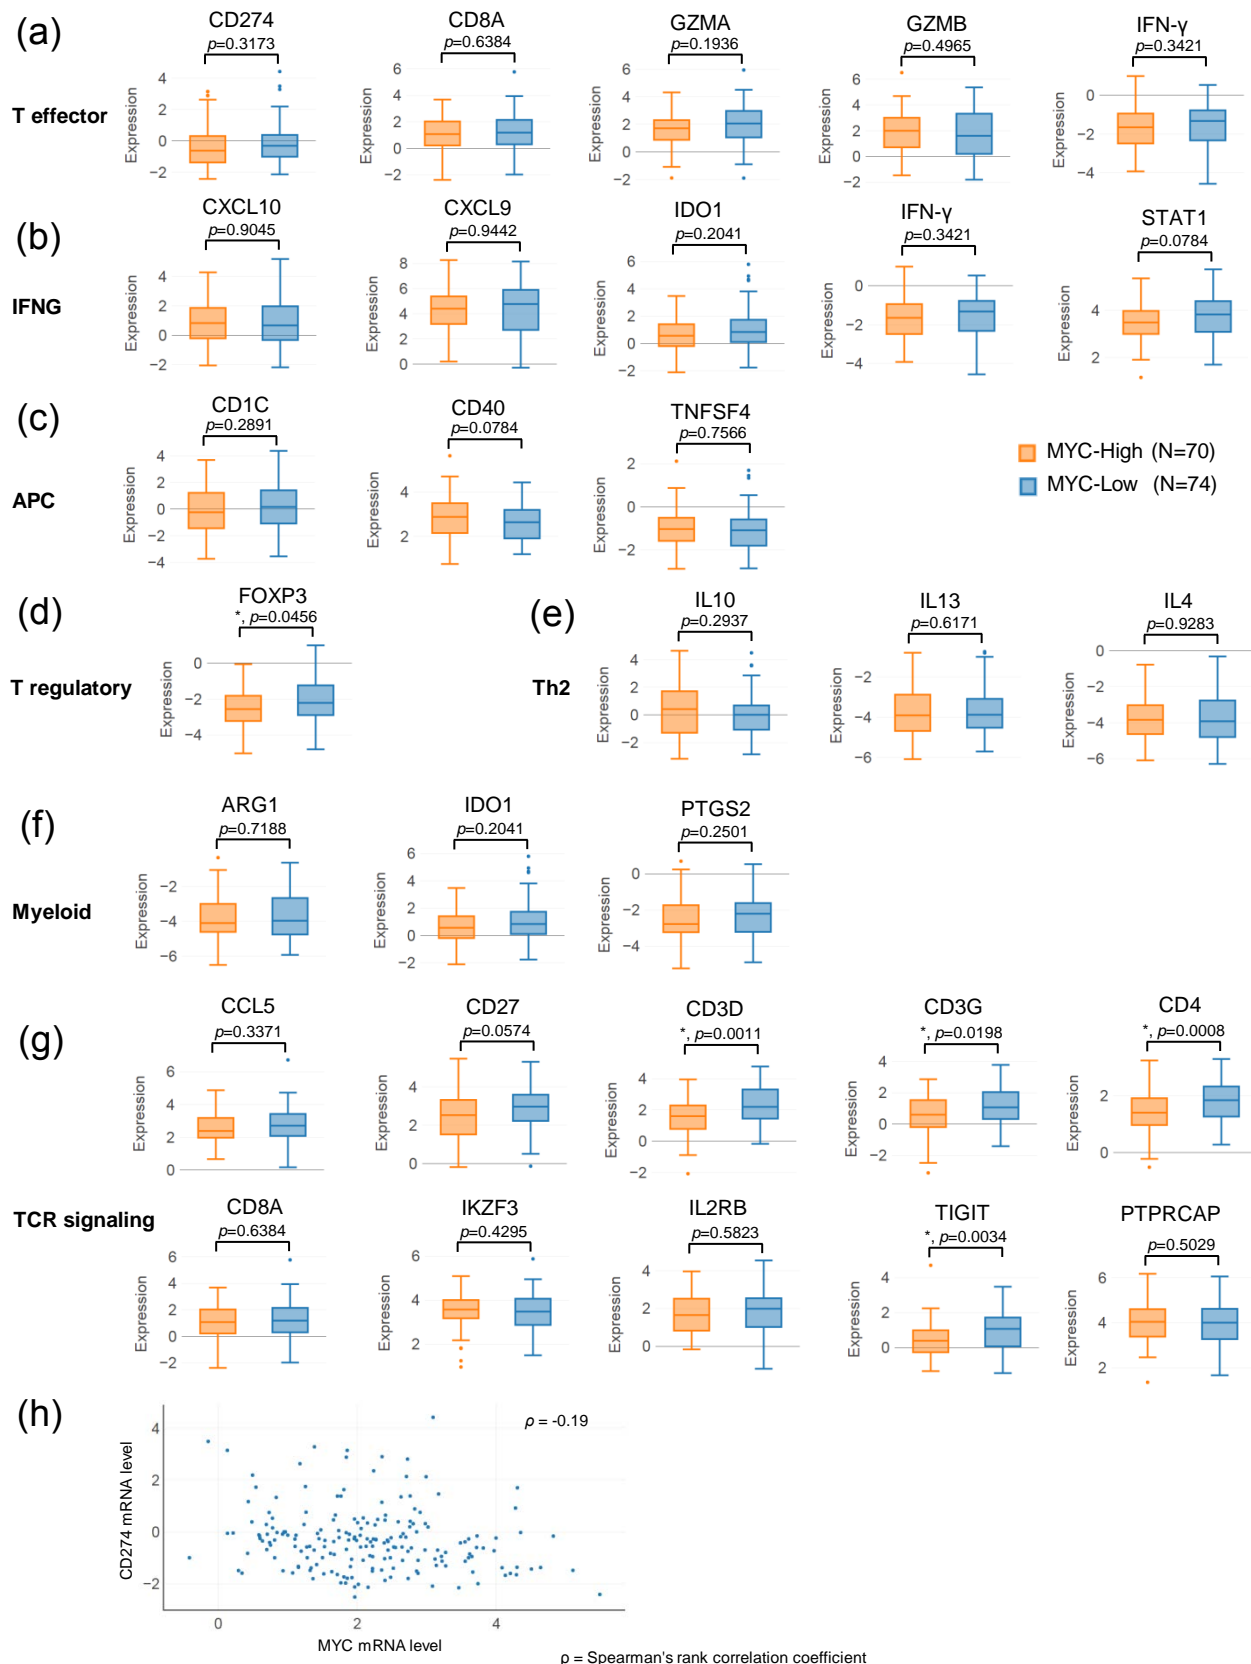

Supplement: mmc2.pdf [file mmc2.pdf]
